# Supplementary material
Source: PubMed Central journal article supplement (PMC2944778)

## Zhu et al, Supplementary Figure S1

**Supplementary Fig. S1** Phage antibodies bind to antigens other than CD133. **A**, Caco-2 cells express high levels of CD133. PE-conjugated control mouse IgG and anti-CD133 mAb were incubated with Caco-2 cells and binding detected by FACS. **B**, GBM sphere-targeting phage do not bind to CD133-expressing Caco-2 cells. Four tumor sphere cell-targeting phage (GB1, GB8, GH9 and GC4) were tested. Negative control: a non-binding phage. Positive control: a Caco-2 binding phage preparation. **C**, Antibody immunoprecipitation of Caco-2 lysates. Lane 1: immunoprecipitation with anti-CD133 mAb. Lane 2: immunoprecipitation with the GC4 antibody. All immunoprecipitation products were analyzed on a SDS-PAGE gel followed by Western blot with anti-CD133 antibody and horseradish peroxidase-conjugated anti-mouse secondary antibody. Arrow indicates CD133. Molecular weights (kd) are indicated.

A

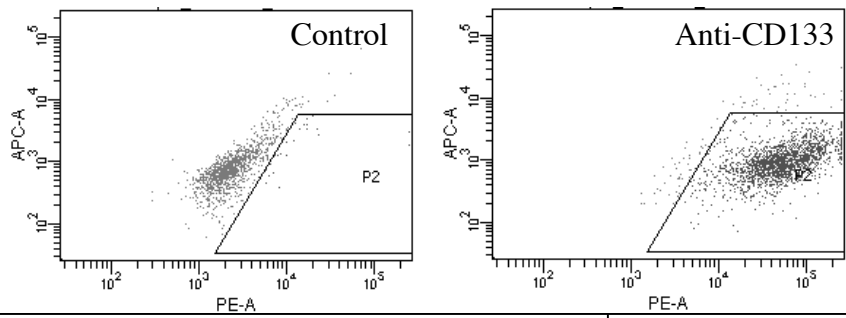

B

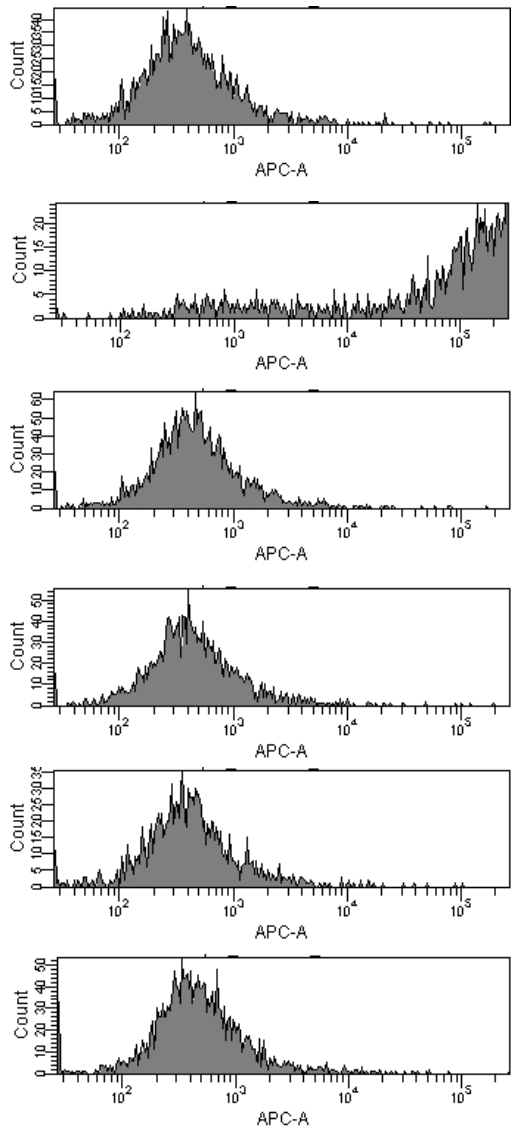

Negative control

Positive control

GB1

GB8

GH9

GC4

C

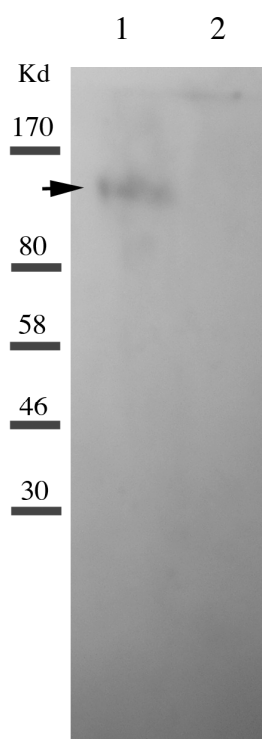

Supplement: NIHMS231497-supplement-1.pdf [file NIHMS231497-supplement-1.pdf]
