# Supplementary material
Source: PubMed Central journal article supplement (PMC2944778)

**Zhu et al, Supplementary Figure S2**

**Supplementary Fig. S2** Inhibition of established GBM tumor spheres by GC4. Established spheroids were treated with a control non-binding scFv and the GC4 scFv. The number of spheroids exceeding 50  $\mu\text{m}$  in diameter was counted and indicated. \*,  $P < 0.05$ .

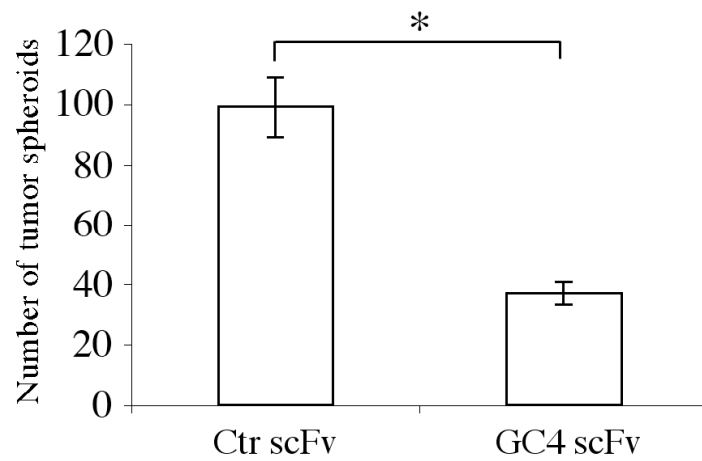

Supplement: NIHMS231497-supplement-2.pdf [file NIHMS231497-supplement-2.pdf]
