# Supplementary material
Source: PubMed Central journal article supplement (PMC2944778)

**Zhu et al, Supplementary Figure S3**

**Supplementary Fig. S3** Recombinant GC4 IgG1 retains binding specificity of the parental scFv. FACS analysis was performed to determine binding of GC4 IgG1 (1  $\mu\text{g/ml}$ ) in the presence of the parental GC4 or four other scFvs (50  $\mu\text{g/ml}$  each). Binding was detected by fluorescently labeled anti-human IgG antibody. Normalized mean fluorescence intensities were used to compare binding results. Error bars indicate standard deviations of duplicated experiments. \*,  $P < 0.05$ .

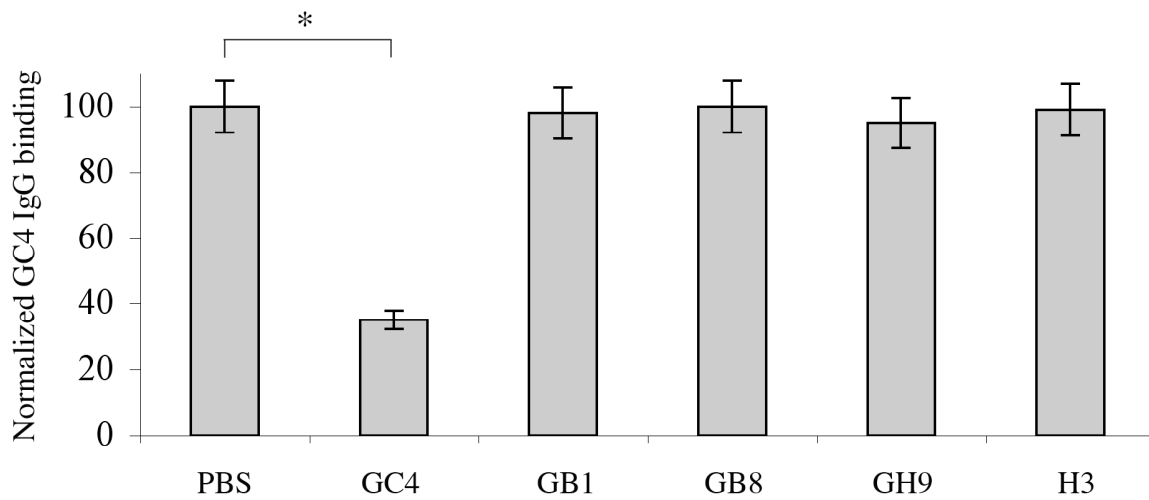

Supplement: NIHMS231497-supplement-3.pdf [file NIHMS231497-supplement-3.pdf]
