# Supplementary material
Source: PubMed Central journal article supplement (PMC2944778)

**Zhu et al, Supplementary Figure S4**

**Supplementary Fig. S 4** Binding constant of GC4 IgG1 to GBM tumor spheres.

Measured at RT by FACS, the  $k_d$  of the GC4 IgG is 79.69 nM, with standard deviation of 9.20 nM. MFI values were fitted using GraphPad.

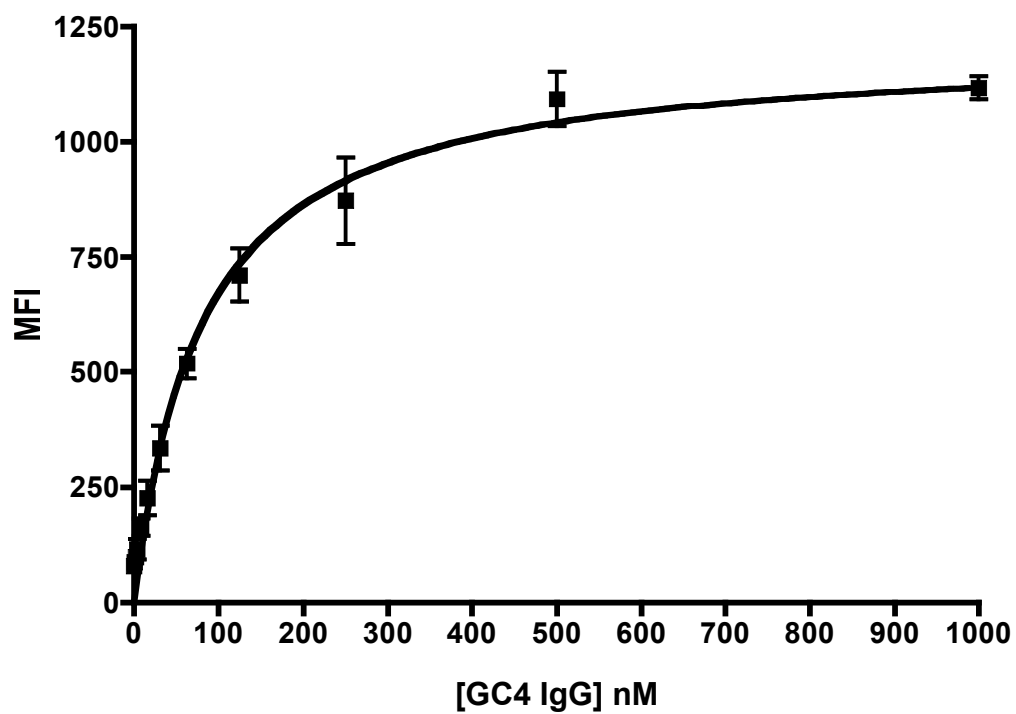

Supplement: NIHMS231497-supplement-4.pdf [file NIHMS231497-supplement-4.pdf]
