# Supplementary material
Source: PubMed Central journal article supplement (PMC2944778)

**Zhu et al, Supplementary Figure S5**

**Supplementary Fig. S5** Binding constant of GC4 scFv to GBM tumor spheres. Measured at RT by FACS, the  $k_d$  of the GC4 scFv is 222.22 nM, with standard deviation of 82.22 nM. MFI values were fitted using GraphPad.

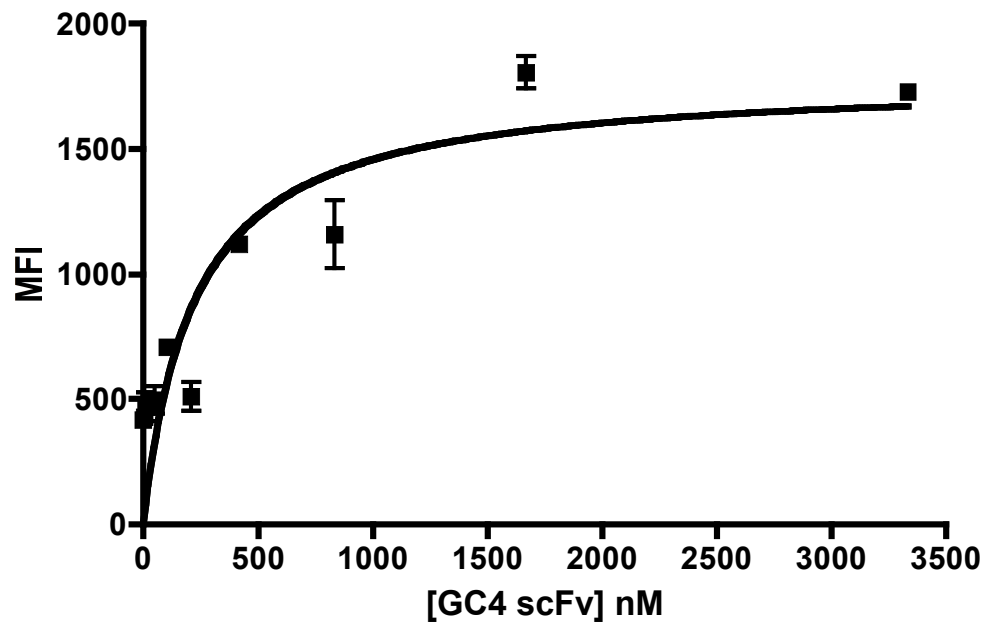

Supplement: NIHMS231497-supplement-5.pdf [file NIHMS231497-supplement-5.pdf]
